# Supplementary material for: The Heat Stress Transcription Factor LlHsfA4 Enhanced Basic Thermotolerance through Regulating ROS Metabolism in Lilies (Lilium Longiflorum)
Source: MDPI journal article supplement (doi:10.3390/ijms23010572), 2022-01-05
Supplement: s1 [file s1]

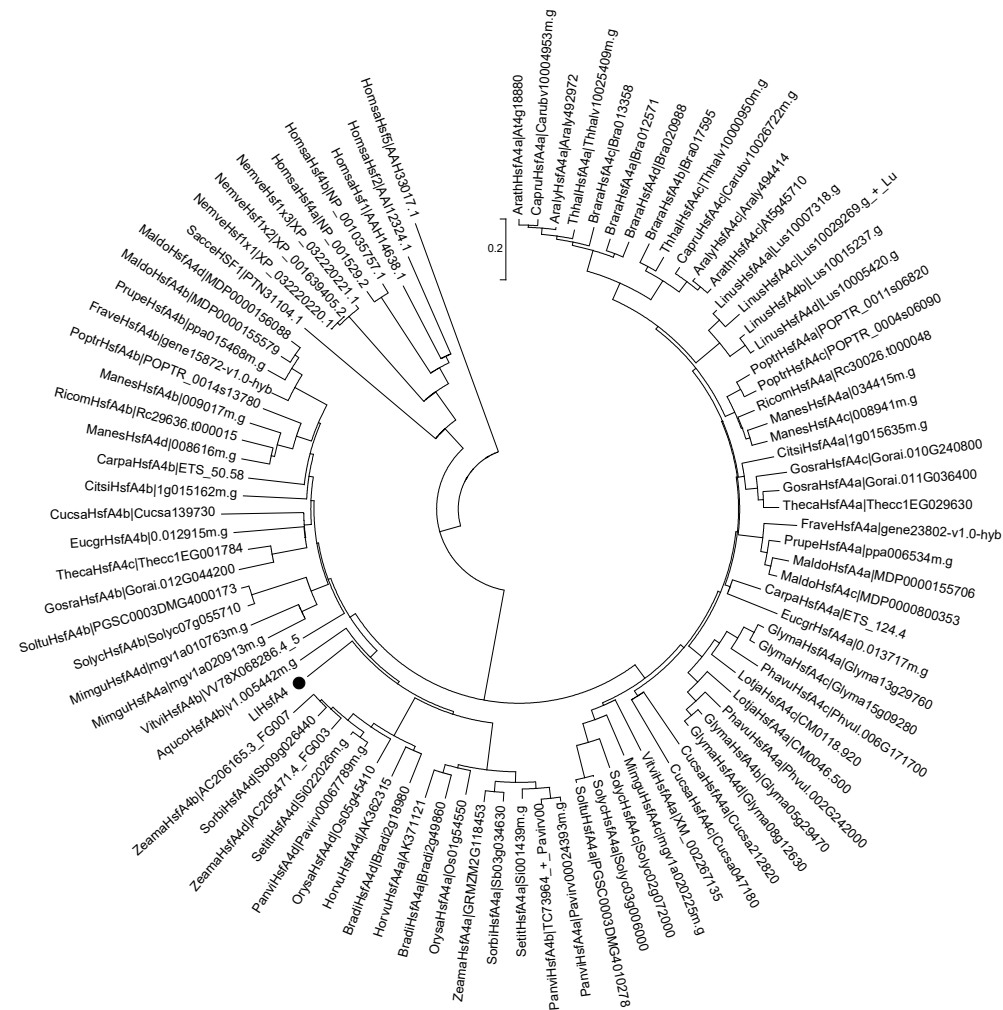

**Supplementary Figure S1.** Phylogenetic tree of LIHsfA4 and all Hsfs in different monocotyledonous plants and three non-plant organisms. This tree was constructed by ClustalW 2.0 and MEGA 5.0 software. The dark dot means LIHsfA4 protein.

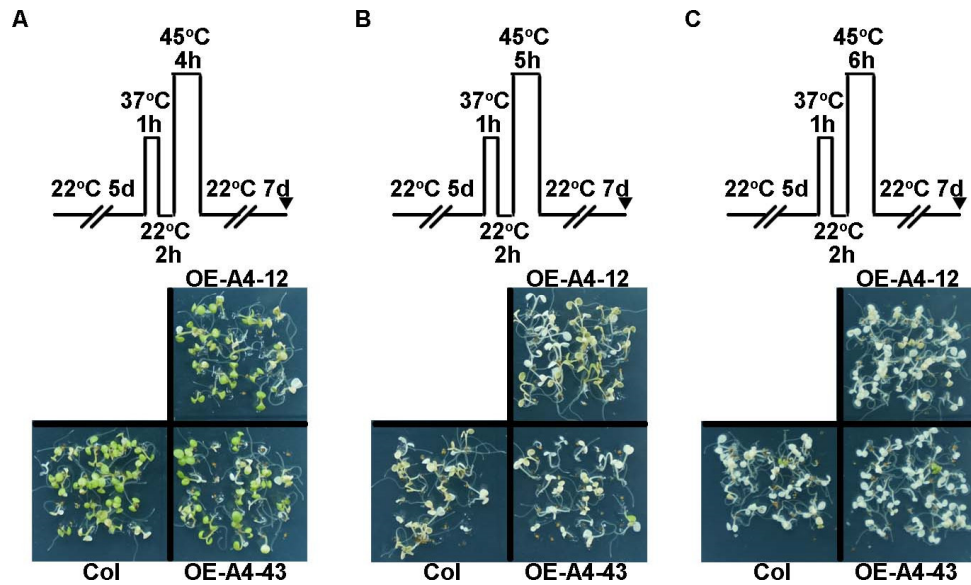

**Supplementary Figure S2.** Transgenic Arabidopsis plants of LIHsfA4 did not enhance acquired thermotolerance. 5-day old seedlings of two transgenic lines and wild type were treated with 37 °C for 1h, then recovery for 2 h at 22°C, and then subjected to 45°C with different times as 4 h (A), 5 h (B) and 6 h (C) to examine acquired thermotolerance.

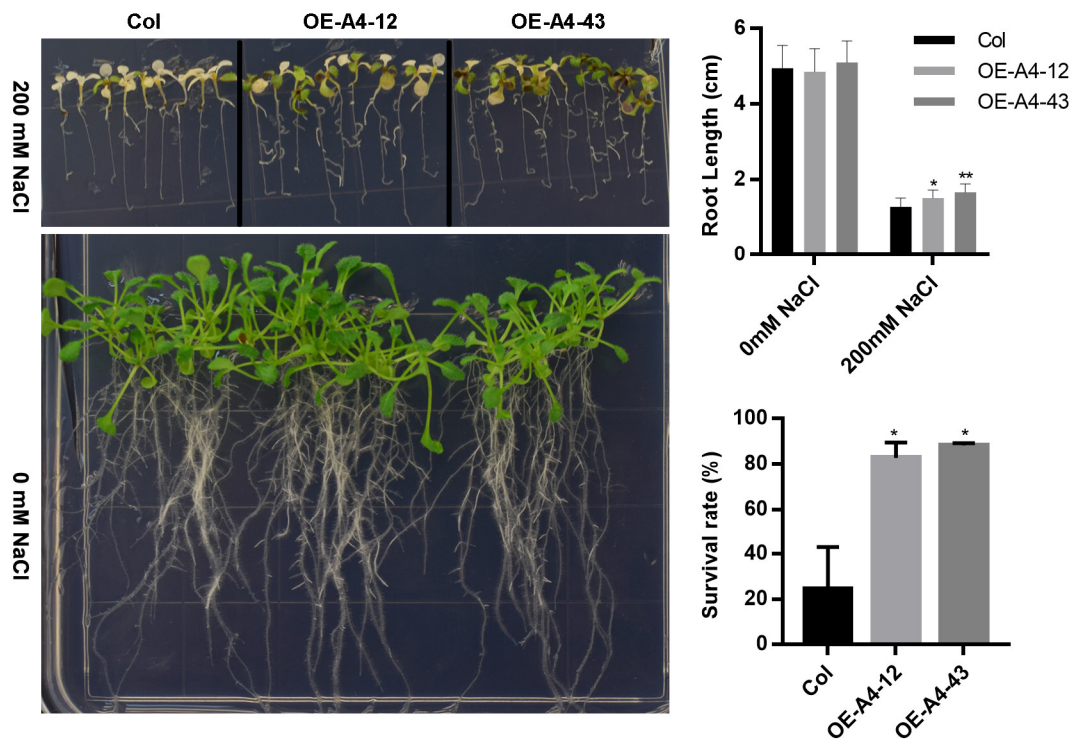

**Supplementary Figure S3.** Transgenic Arabidopsis plants of LIHsfA4 enhanced salt tolerance. 5-day old seedlings of two transgenic lines and wild type were transferred into MS medium containing 200 mM NaCl for 10 days before being photographed. T-test analysis of variance was employed to identify treatment means that differed statistically. Samples with different letters are significantly different: \* $p < 0.05$ , \*\* $p < 0.01$ .

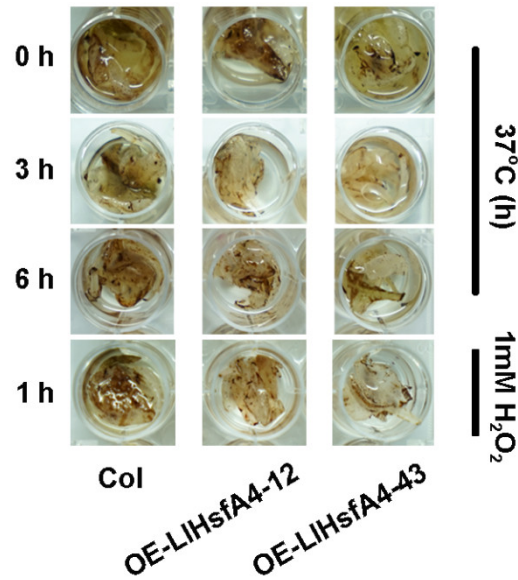

**Supplementary Figure S4.** Content of H<sub>2</sub>O<sub>2</sub> decreased in transgenic Arabidopsis plants of LIHsfA4. 10-day old seedlings of two transgenic lines and wild type were treated with 1 mM H<sub>2</sub>O<sub>2</sub> for 1 h or heat (37 °C) with different time and then used for DAB staining.

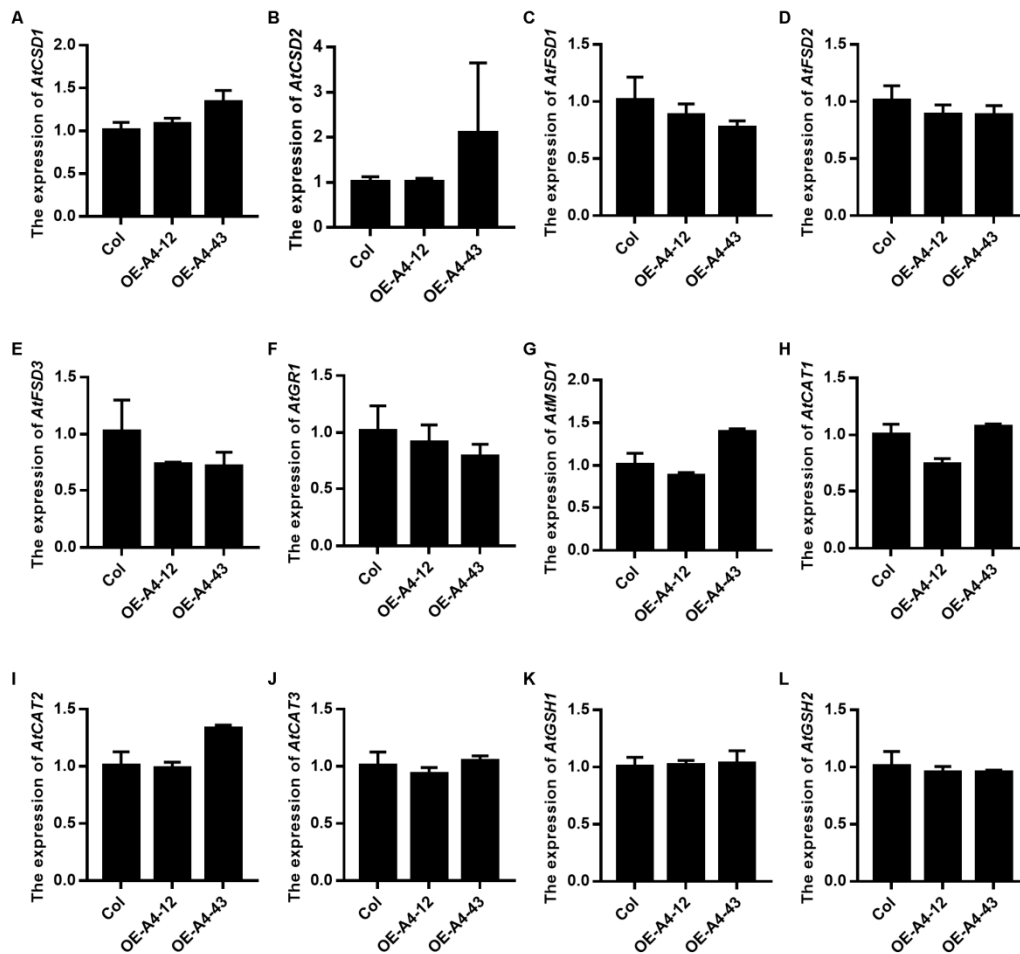

**Supplementary Figure S5.** Expression of genes related with ROS metabolism was examined in LIHsfA4 transgenic plants. The mRNA level of *AtSODs*, *AtCATs*, *AtGSH*, and *AtGRs* were detected in wild type (Col) and transgenic lines using qRT-PCR. Expression value of these genes in Col was setting as 1 for comparison and *AtACTIN2* was used as an

internal standard. 10-day-old seedlings were collected for RNA extracting. Three independent experiments were performed each with three technical replicates and showing one experiment result. Unmarked means non-significance..

**Table S1.** Primers used in experiments.

| Primer name                           | Primer sequence                              | Usage                                                     |
|---------------------------------------|----------------------------------------------|-----------------------------------------------------------|
| <i>LIHsfA4</i> -Clone-F               | 5'TTYAAGCACARCAACTTCTCC 3'                   | Used for conserved sequence cloning                       |
| <i>LIHsfA4</i> -Clone-R               | 5'AGAAAYTGTTSCCARAABACATC 3'                 |                                                           |
| <i>LIHsfA4</i> -3'-F1                 | 5'CAGAATCGTATGGAGACCTCTGTATCAGT 3'           | 3'RACE                                                    |
| <i>LIHsfA4</i> -3'-F2                 | 5'CTTAATGAGCTTCGTGCCTCGTCTGAG 3'             |                                                           |
| <i>LIHsfA4</i> -5'-R1                 | 5'TCCAGTACCTGCATCTGCCGATC 3'                 | 5'RACE                                                    |
| <i>LIHsfA4</i> -5'-R2                 | 5'CTGCAGCTCGGATATCAAAGACCCC 3'               |                                                           |
| <i>LIHsfA4</i> -F                     | 5' GAGTCAAACCTCCTCTCTGCTTCTTCTCC 3'          | LIHsfA4 full-length cDNA clone                            |
| <i>LIHsfA4</i> -R                     | 5' GGAACAACATCAAGTCAGTACGCTAGAAAGG 3'        |                                                           |
| <i>LIHsfA4</i> -SP1                   | 5' ATATACGTGTACACAATCCAACCTCACC 3'           | Used for cloning of <i>LIHsfA4</i> promoter.              |
| <i>LIHsfA4</i> -SP2                   | 5' AGCAATCTGGCCAACTGAAGATGATTTAATAC 3'       |                                                           |
| <i>LIHsfA4</i> -SP3                   | 5' CCACGTCAGAAATTCCAATAGAGATGATCCATG 3'      |                                                           |
| <i>LIHsfA4</i> -F- <i>Xba</i> I-1300  | 5' GCTCTAGAATGGACCCCTCGCAGGGGGC 3'           | Used for <i>pSuper::LIHsfA4</i> -GFP vector construction. |
| <i>LIHsfA4</i> -R- <i>Kpn</i> I-1300  | 5' GGGGTACCAGTTCTCTGTGCAGAAGCAAGATGCCC 3'    |                                                           |
| <i>LIHsfA4</i> -F- <i>Pst</i> I-1391  | 5' AACTGCAGTTGTAGATGACTTTGAGAACTTGTCTATAG 3' | Used for <i>pHsfA4::GUS</i> vector construction.          |
| <i>LIHsfA4</i> -F- <i>Xma</i> I-1391  | 5' TCCCCCGGGGGCGATCGGATCGATCGGAAC 3'         |                                                           |
| <i>LIHsfA4</i> -PGBK-F- <i>Nde</i> I  | 5' GGAATTCCATATGATGGACCCCTCGCAGGGGGC 3'      | Used for pBD-LIHsfA4 vector construction.                 |
| <i>LIHsfA4</i> -PGBK-R- <i>Bam</i> HI | 5' CGGGATCCTTAAGTTCTCTGTGCAGAAGCAAGATGCCC 3' |                                                           |

|                      |                                              |                               |
|----------------------|----------------------------------------------|-------------------------------|
| <i>LlHsfA4</i> -D1-R | 5' CGGGATCCTTACACCCCAGTGGTCGCAGC 3'          |                               |
| <i>LlHsfA4</i> -D2-R | 5' CGGGATCCTTAGCTTTTCAGCGTAATTCCTCGACTC 3'   |                               |
| <i>LlHsfA4</i> -D3-R | 5' CGGGATCCTTACGAAGGCACACGAGGCAAG 3'         |                               |
| <i>LlHsfA4</i> -D4-R | 5' CGGGATCCTTACATACGATTCTGACTCTCTGTATCAGC 3' |                               |
| <i>LlHsfA4</i> -RT-F | 5' CCGAGGGAGTATTTGGTGGAAC 3'                 | qPCR of <i>LlHsfA4</i> .      |
| <i>LlHsfA4</i> -RT-R | 5' CTCAAAATAGATGGCCACAGAAGAAG 3'             |                               |
| <i>18S rRNA</i> -F   | 5' CTGAATCAGGATTGGATATCTGAGG 3'              | qPCR of the <i>18S rRNA</i> . |
| <i>18S rRNA</i> -R   | 5' AACTAGGTTACTGTCACTGGATAAC 3'              |                               |
| <i>AtActin2</i> -F   | 5' AGGAACTGGATCTGGTATGGGAACAT 3'             |                               |
| <i>AtActin2</i> -R   | 5' GCAAATCCAGCCTTCACCAT 3'                   |                               |
| <i>AtHsp17.6</i> -F  | 5' CCAAAGAAAAAGCCAAGAAGC 3'                  |                               |
| <i>AtHsp17.6</i> -R  | 5' TGGAAACCTTCCAAACTCCA 3'                   |                               |
| <i>AtZat6</i> -F     | 5' GTGACCTTGACCTGCCTTCTTC 3'                 |                               |
| <i>AtZat6</i> -R     | 5' CTCCGGCAGATTGAGTAAGC 3'                   | Primers used for qPCR         |
| <i>AtWRKY30</i> -F   | 5' AGAGCGATGATTCCGATCAAG 3'                  |                               |
| <i>AtWRKY30</i> -R   | 5' CATCGTCCAGCGTTCTATCAA 3'                  |                               |
| <i>AtMBF1c</i> -F    | 5' AGCAGATACCCAGGAGCAGT 3'                   |                               |
| <i>AtMBF1c</i> -R    | 5' TTCGGATCGCGTAGGTCTTG 3'                   |                               |
| <i>AtHsp25.3</i> -F  | 5' GATCAAGATGCGTTTCGACAT 3'                  |                               |

|                     |                                   |
|---------------------|-----------------------------------|
| <i>AtHsp25.3</i> -R | 5' TTCTACAGAGATTTTGACGTCTTCTT 3'  |
| <i>AtGolS1</i> -F   | 5' AGCCACCGGCTCTTTACTTC 3'        |
| <i>AtGolS1</i> -R   | 5' GTTCAGCGAAAGGAGTCGGA 3'        |
| <i>AtHsp22</i> -F   | 5' ACTACTCCAGGCAGCTTGCTA 3'       |
| <i>AtHsp22</i> -R   | 5' CTTGAATGGATCAGGGAACC 3'        |
| <i>AtZat12</i> -F   | 5' GACGCTTTGTCTGTCTGGATT 3'       |
| <i>AtZat12</i> -R   | 5' GTGTCCTCCCAAAGCTTGTC 3'        |
| <i>AtAPX1</i> -F    | 5' GTCCATTTCGGAACAATGAGGTTTGAC 3' |
| <i>AtAPX1</i> -R    | 5' GTGGGCACCAGATAAAGCGACAAT 3'    |
| <i>AtAPX2</i> -F    | 5' TGATGTGAAGACGAAGACAGGAGGAC 3'  |
| <i>AtAPX2</i> -R    | 5' CCCATCCGACCAAACACATCTCTTA 3'   |
| <i>AtAPX3</i> -F    | 5' CCCAAAATCACATACGCAGACCTGTA 3'  |
| <i>AtAPX3</i> -R    | 5' AGTTGTCAAACCTTCAGCGGCTCTTG 3'  |
| <i>AtAPX4</i> -F    | 5' CTACTAAATCCGGGGGAGCCAATG 3'    |
| <i>AtAPX4</i> -R    | 5' CTCTGTTGCATCACTCCTTCCAAAAT 3'  |
| <i>AtAPX5</i> -F    | 5' AGCTAAACCGTCCACACAACAAAGGT 3'  |
| <i>AtAPX5</i> -R    | 5' GTCCCAAAGTGTGACCTCCAGAGAGA 3'  |
| <i>AtAPX6</i> -F    | 5' TGCAAAACGAAATAAGGAAAAGTGGTG 3' |
| <i>AtAPX6</i> -R    | 5' CACTCAGGGTTTCTGGAGGTAGCTTG 3'  |

|                  |                                  |
|------------------|----------------------------------|
| <i>AtsAPX-F</i>  | 5' TGCTAATGCTGGTCTTGTGAATGCTT 3' |
| <i>AtsAPX-R</i>  | 5' CCACTACGTTCTGGCCTAGATCTTCC 3' |
| <i>AttAPX-F</i>  | 5' CAGAATGGGACTTGATGACAAGGAAA 3' |
| <i>AttAPX-R</i>  | 5' ATGCAGCCACATCTTCAGCATACTTC 3' |
| <i>AtCSD1 -F</i> | 5' AGTAACCAAAGAGAGACGAAGCA 3'    |
| <i>AtCSD1 -R</i> | 5' CCTTCCTGGGTGAAAAAGATAG 3'     |
| <i>AtCSD2 -F</i> | 5' CGAAGGAGTTGTTACTTTGACCC 3'    |
| <i>AtCSD2 -R</i> | 5' GAACCACAAAGGCTCTTCCAAC 3'     |
| <i>AtFSD1 -F</i> | 5' CTCAAGCCACCTCCATTCG 3'        |
| <i>AtFSD1 -R</i> | 5' GCGTTGTTGAAAGCAGGGA 3'        |
| <i>AtFSD2 -F</i> | 5' TGGATTATCACTGGGGCAAAC 3'      |
| <i>AtFSD2 -R</i> | 5' GGATAGACTCCCAGAAGAACTCG 3'    |
| <i>AtFSD3 -F</i> | 5' GTGAACCCAACATCCCAATCG 3'      |
| <i>AtFSD3 -R</i> | 5' TTGCGTCACTAACATTACTGTCACC 3'  |
| <i>AtGRI-F</i>   | 5' GGGTTTTGATGACGAAATGAGG 3'     |
| <i>AtGRI-R</i>   | 5' ATAGGACGACATCTGCCACGA 3'      |
| <i>AtMSD1-F</i>  | 5' GTTTGGGAGCACGCCTACTAC 3'      |
| <i>AtMSD1-R</i>  | 5' GTTCATCTCCTTATGTCATCGTGTA 3'  |
| <i>AtCAT1-F</i>  | 5' CGCCGATTTGCGAGATACA 3'        |



|                   |                                 |
|-------------------|---------------------------------|
| <i>AtCAT1</i> -R  | 5' ACCCTCTCAGGAATCCGCTC 3'      |
| <i>AtCAT2</i> -F  | 5' TATCCAAC TCCGCCTGCTGTCT 3'   |
| <i>AtCAT2</i> -R  | 5' ATGCGTGGGTCGGATAGGG 3'       |
| <i>AtCAT3</i> -F  | 5' GGTGACACTCAGAGACATCGCC 3'    |
| <i>AtCAT3</i> -R  | 5' AAACCTGTCTTGCCTGTCTGG 3'     |
| <i>AtGSH1</i> - F | 5' TTTGAGCAGTATGTTGACTACGCAC 3' |
| <i>AtGSH1</i> - R | 5' GCAGTTCACCAGGGAGACAGG 3'     |
| <i>AtGSH2</i> -F  | 5' GGAAATGCTTTGCTGGGC 3'        |
| <i>AtGSH2</i> -R  | 5' TCTCCATAGATGTTGTTTCCTCC 3'   |
